# Supplementary material for: Whole cervix imaging of collagen, muscle, and cellularity in term and preterm pregnancy
Source: PubMed Central journal article supplement (PMC11271604; doi:10.1038/s41467-024-48680-9), 2024-07-19
Supplement: 41467_2024_48680_MOESM1_ESM.pdf [file 41467_2024_48680_MOESM1_ESM.pdf]

# Supplementary Materials for

## Whole cervix imaging of collagen, muscle, and cellularity in term and preterm pregnancy

### The PDF includes:

|                                                                                               |    |
|-----------------------------------------------------------------------------------------------|----|
| Results - Supplementary .....                                                                 | 2  |
| Correlation at different grid size .....                                                      | 2  |
| Correlation analysis of ex vivo specimen between diffusion tensor imaging and histology ..... | 4  |
| Correlation analysis of ex vivo specimen between free water imaging and histology .....       | 7  |
| Methods - Supplementary .....                                                                 | 9  |
| Whole cervix DBSI multi-tensor models.....                                                    | 9  |
| <i>b</i> table for both in vivo and ex vivo imaging .....                                     | 10 |
| Ex vivo imaging of cervical tissue blocks.....                                                | 11 |
| Human in vivo MR imaging sequences .....                                                      | 12 |

### Supplementary Figures

|                                                                                                                                         |    |
|-----------------------------------------------------------------------------------------------------------------------------------------|----|
| Fig S. 1: Pearson correlation analysis of DBSI versus histology at grid sizes of 2.5mm, 2mm, 1.75mm, and 1.5mm for specimen P1-S1.....  | 2  |
| Fig S. 2: Pearson correlation analysis of DBSI versus histology at grid sizes of 2.5mm, 2mm, 1.75mm, and 1.5mm for specimen P1-S2.....  | 3  |
| Fig S. 3: Pearson correlation analysis of DBSI versus histology at grid sizes of 2.5mm, 2mm, 1.75mm, and 1.5mm for specimen P2-S1.....  | 3  |
| Fig S. 4: Pearson correlation analysis of DBSI versus histology at grid sizes of 2.5mm, 2mm, 1.75mm, and 1.5mm for specimen NP1-S1..... | 4  |
| Fig S. 5: Pearson correlation analysis of DTI versus histology for specimen P1-S1. ....                                                 | 5  |
| Fig S. 6: Pearson correlation analysis of DTI versus histology for specimen P1-S2. ....                                                 | 5  |
| Fig S. 7: Pearson correlation analysis of DTI versus histology for specimen P2-S1. ....                                                 | 6  |
| Fig S. 8: Pearson correlation analysis of DTI versus histology for specimen NP1-S1. ....                                                | 6  |
| Fig S. 9: Pearson correlation analysis of FWI versus histology for specimen P1-S1.....                                                  | 7  |
| Fig S. 10: Pearson correlation analysis of FWI versus histology for specimen P1-S2.....                                                 | 7  |
| Fig S. 11: Pearson correlation analysis of FWI versus histology for specimen P2-S1.....                                                 | 8  |
| Fig S. 12: Pearson correlation analysis of FWI versus histology for specimen NP1-S1.....                                                | 8  |
| Fig S. 13: Isotropic tensor models for whole cervix DBSI.....                                                                           | 9  |
| Fig S. 14 Custom cervix specimen holder .....                                                                                           | 11 |
| Fig S. 15 Custom Helmholtz pair coil .....                                                                                              | 11 |

### Supplementary Tables

|                                                                  |    |
|------------------------------------------------------------------|----|
| Table S. 1 Anisotropic tensor models for whole cervix DBSI ..... | 9  |
| Table S. 2: <i>b</i> table for in vivo and ex vivo imaging.....  | 10 |

# Results - Supplementary

## Correlation at different grid size

The chosen  $2.5 \times 2.5$  mm grid size, as mentioned in the main text, aligns with the standard in vivo diffusion MRI resolutions in clinical MR scanners. To reinforce the validity of our findings in the main text, conducted additional analyses using different grid sizes ( $2 \times 2$  mm,  $1.75 \times 1.75$  mm, and  $1.5 \times 1.5$  mm). These analyses (Fig S. 1 – Fig S. 4) consistently demonstrate a strong correlation between histology quantification and ex vivo DBSI metrics, underscoring the robustness of our approach.

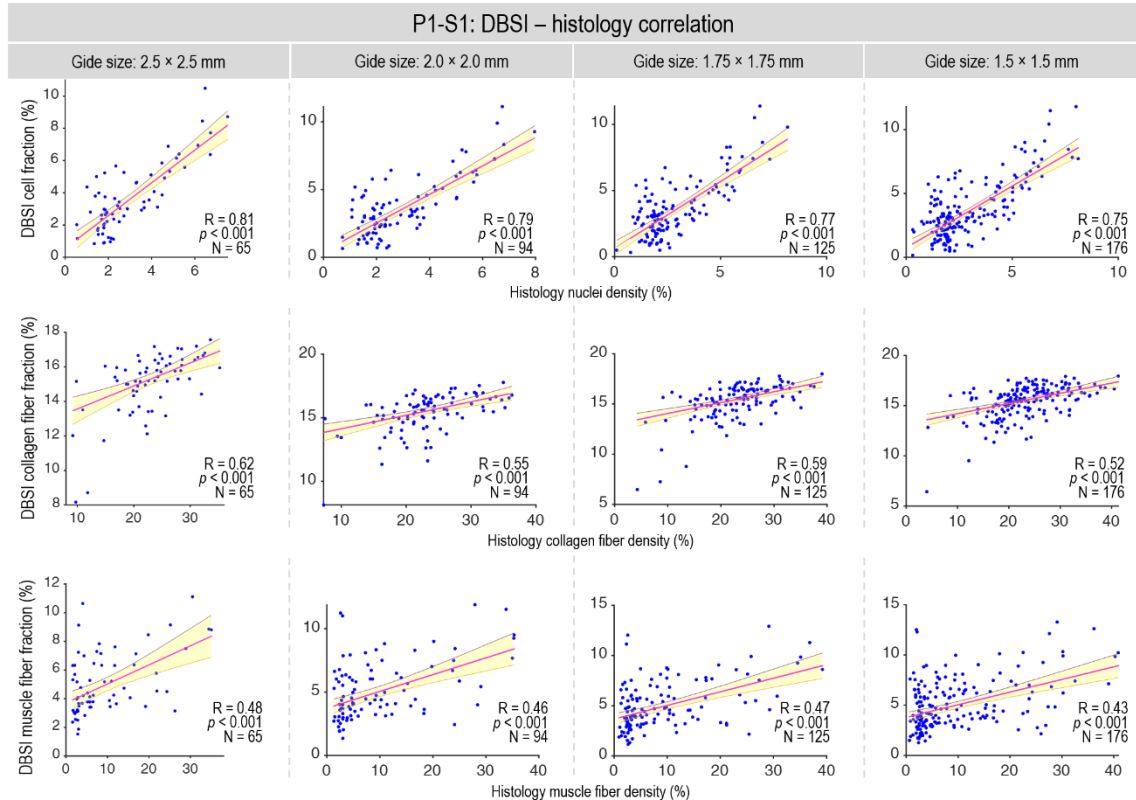

**Fig S. 1: Correlation analysis of DBSI versus histology at grid sizes of 2.5mm, 2mm, 1.75mm, and 1.5mm for specimen P1-S1.** Data points indicate mean values per grid box from Fig. 2, 3, and 4, panels B and C. Pearson correlation: two-sided, at 0.05 significance level; Red lines: linear fits; shaded areas: 95% confidence intervals.

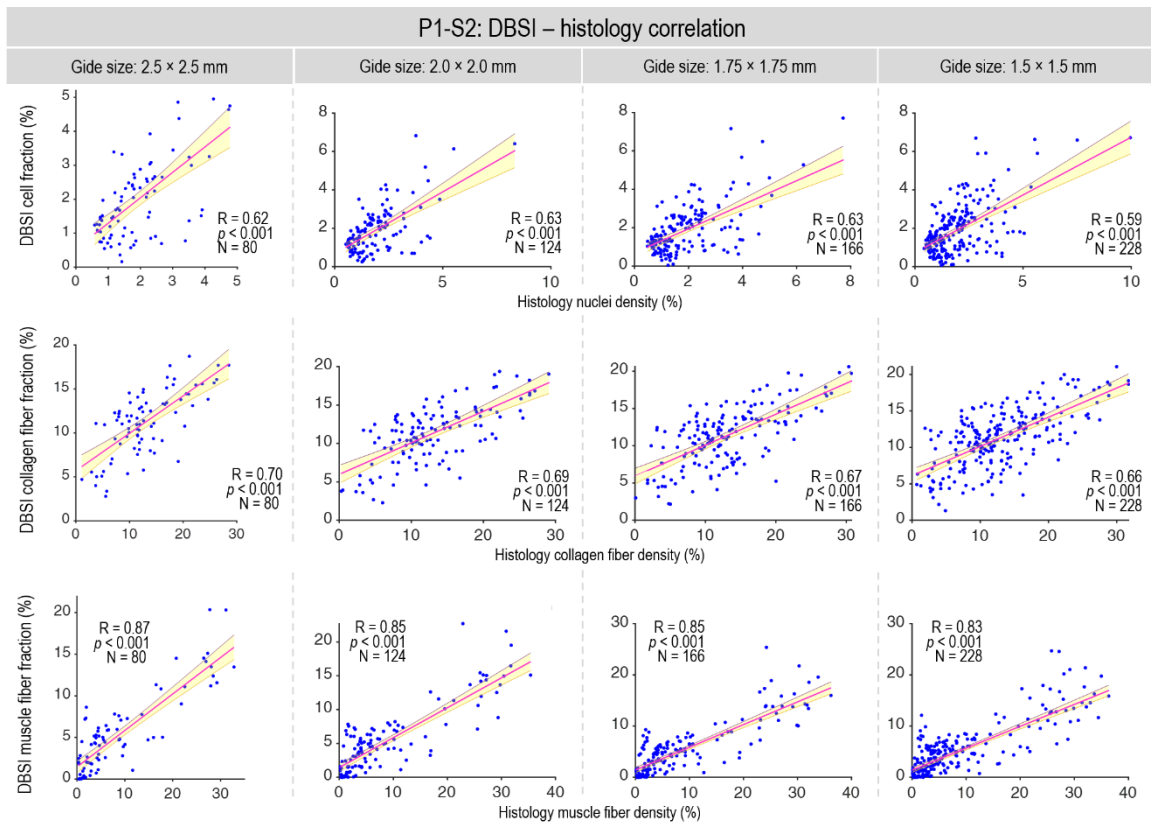

**Fig S. 2: Correlation analysis of DBSI versus histology at grid sizes of 2.5mm, 2mm, 1.75mm, and 1.5mm for specimen P1-S2.** Data points indicate mean values per grid box from Fig. 2, 3, and 4, panels B and C. Pearson correlation: two-sided, at 0.05 significance level; Red lines: linear fits; shaded areas: 95% confidence intervals.

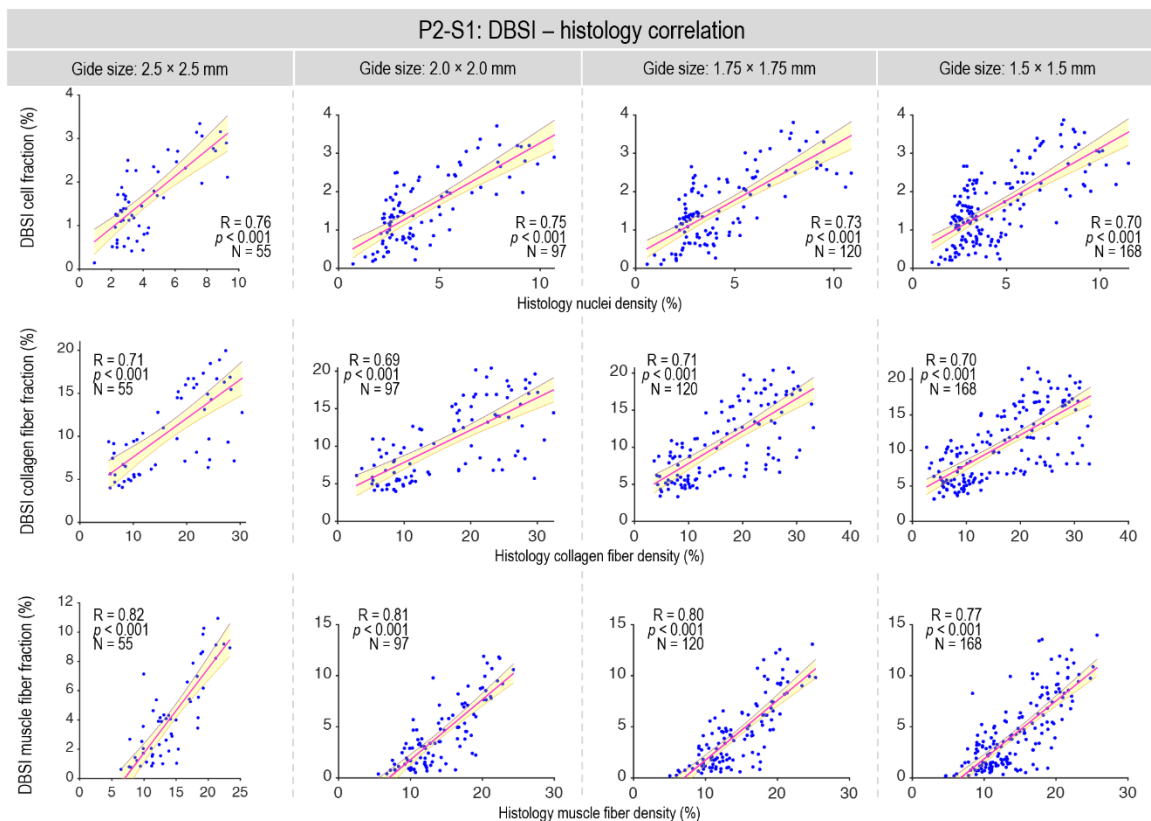

**Fig S. 3: Correlation analysis of DBSI versus histology at grid sizes of 2.5mm, 2mm, 1.75mm, and 1.5mm for specimen P2-S1.** Data points indicate mean values per grid box from Fig. 2, 3, and 4, panels B and C. Pearson correlation: two-sided, at 0.05 significance level; Red lines: linear fits; shaded areas: 95% confidence intervals.

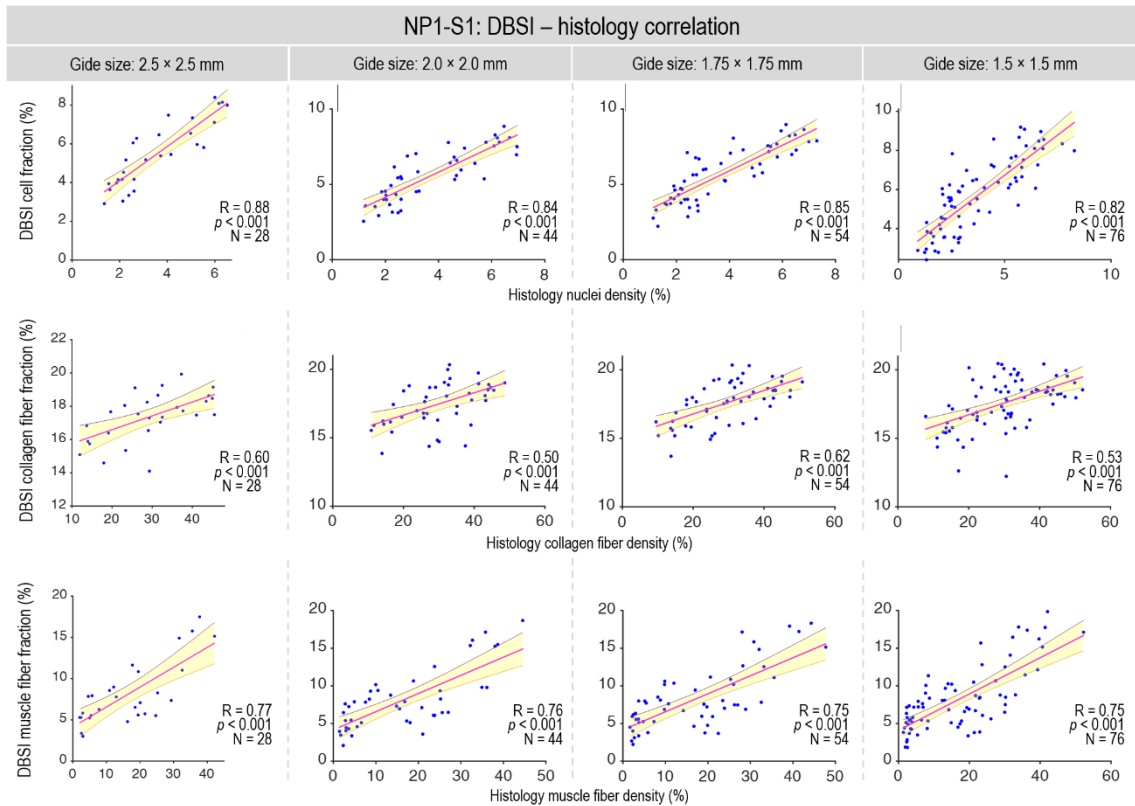

**Fig S. 4: Correlation analysis of DBSI versus histology at grid sizes of 2.5mm, 2mm, 1.75mm, and 1.5mm for specimen NP1-S1.** Data points indicate mean values per grid box from Fig. 2, 3, and 4, panels B and C. Pearson correlation: two-sided, at 0.05 significance level; Red lines: linear fits; shaded areas: 95% confidence intervals.

## Correlation analysis of ex vivo specimen between diffusion tensor imaging and histology

Our supplementary analysis utilizing diffusion tensor imaging (DTI) model (Fig S. 5 – Fig S. 8) reveals that the histology-derived data, including nuclei density indicative of cellularity and collagen fiber density, do not consistently correlate with DTI metrics such as apparent diffusion coefficient (ADC), fractional anisotropy (FA), and axial (AD) and radial diffusivity (RD). Notably, muscle density derived from histology shows a partial correlation with FA. However, given that DTI FA represents the averaged anisotropy from the entire imaging voxel, encompassing both collagen and muscle fibers, it lacks specificity as a biomarker for cervical collagen and muscle fibers.

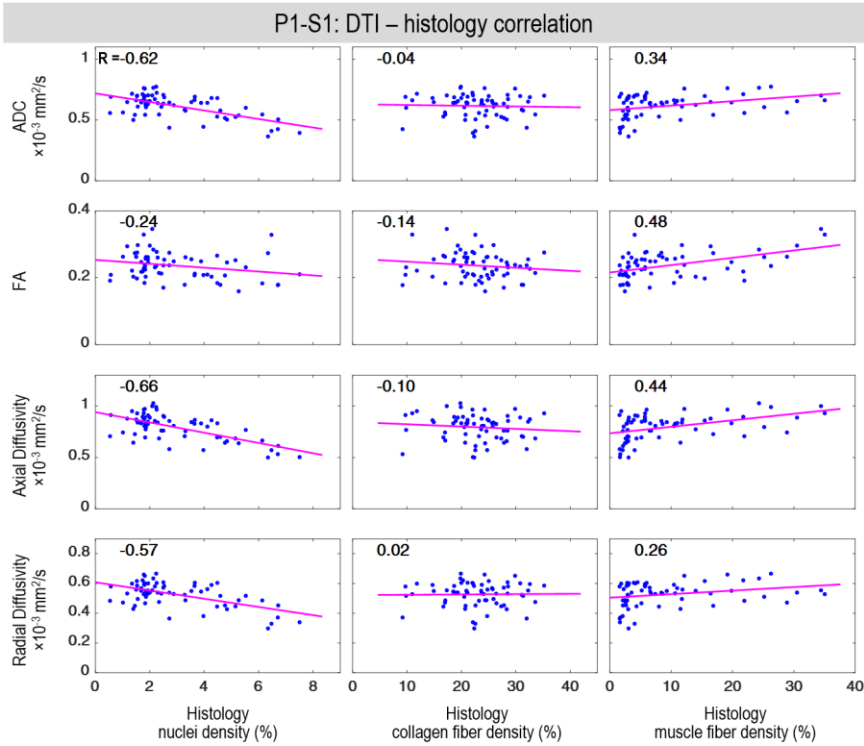

**Fig S. 5: Correlation analysis of DTI versus histology for specimen P1-S1.** Data points indicate mean values per grid box from Fig. 2, 3, and 4, panels B and C. Pearson correlation: two-sided, at 0.05 significance level; Magenta lines: linear fits.

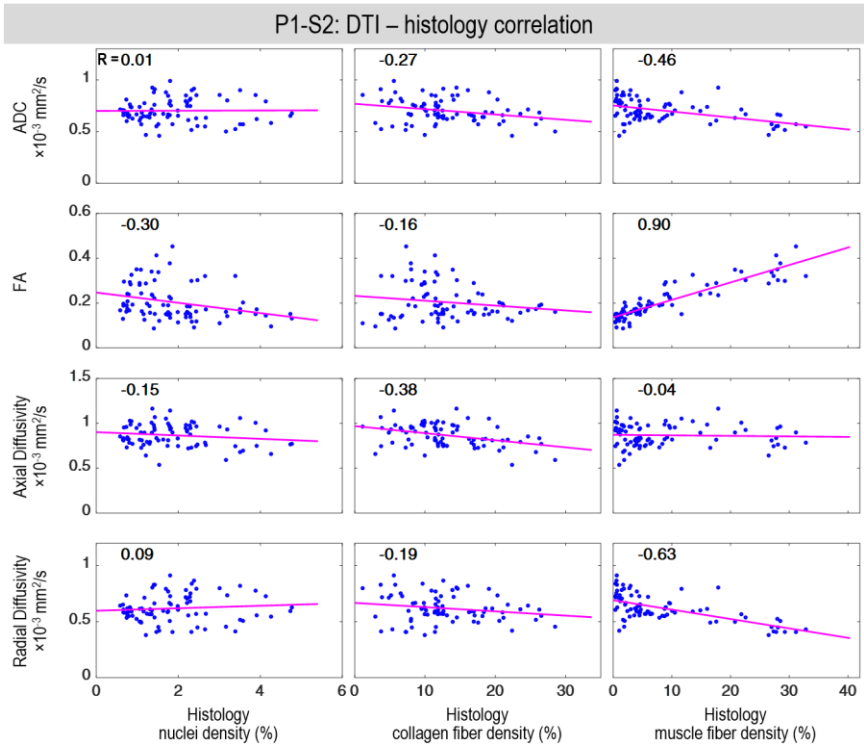

**Fig S. 6: Correlation analysis of DTI versus histology for specimen P1-S2.** Data points indicate mean values per grid box from Fig. 2, 3, and 4, panels B and C. Pearson correlation: two-sided, at 0.05 significance level; Magenta lines: linear fits.

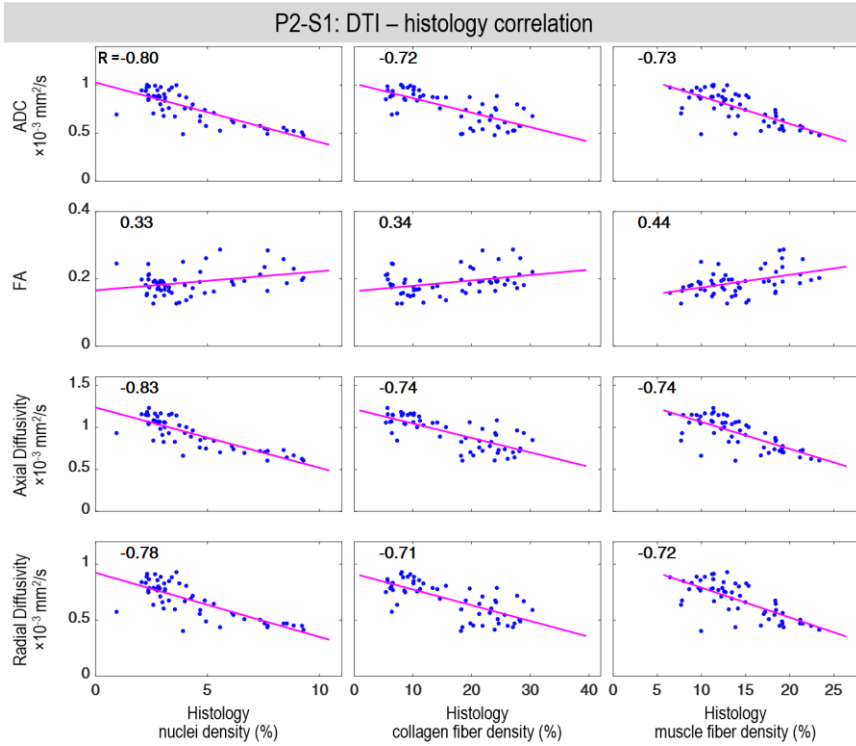

**Fig S. 7: Correlation analysis of DTI versus histology for specimen P2-S1.** Data points indicate mean values per grid box from Fig. 2, 3, and 4, panels B and C. Pearson correlation: two-sided, at 0.05 significance level; Magenta lines: linear fits.

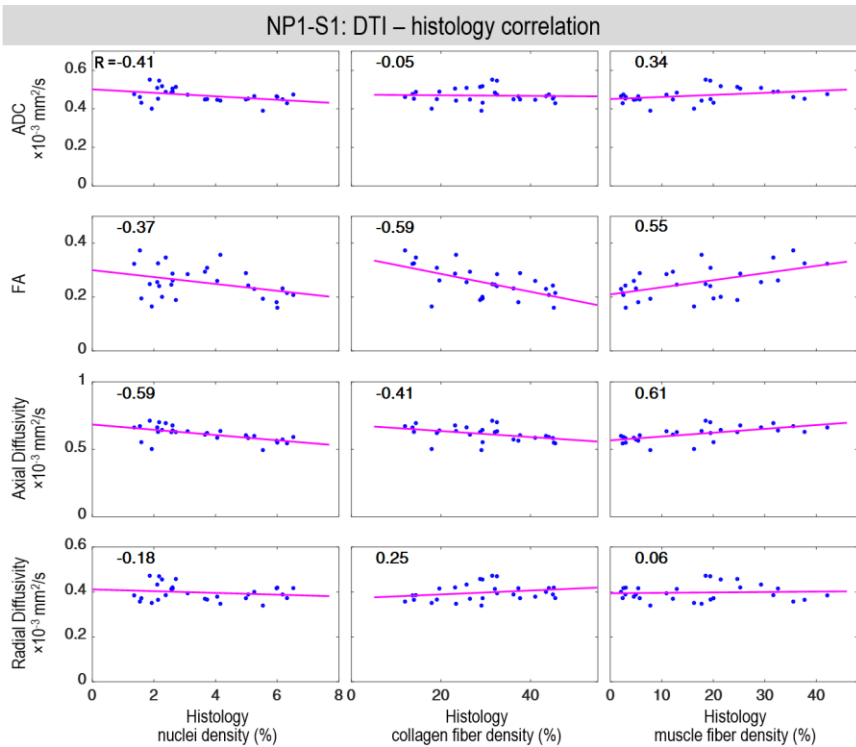

**Fig S. 8: Correlation analysis of DTI versus histology for specimen NP1-S1.** Data points indicate mean values per grid box from Fig. 2, 3, and 4, panels B and C. Pearson correlation: two-sided, at 0.05 significance level; Magenta lines: linear fits.

## Correlation analysis of ex vivo specimen between free water imaging and histology

In the free water imaging (FWI) analysis (Fig S. 9 – Fig S. 12), we observe similar findings as DTI results. The histological data do not show a reliable correlation with FWI metrics.

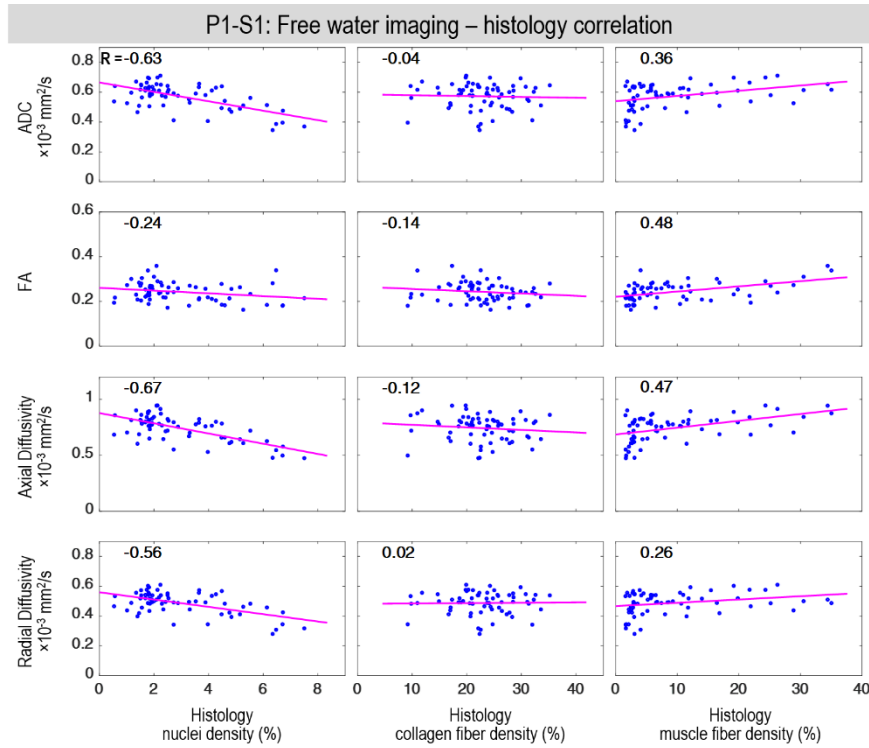

**Fig S. 9: Correlation analysis of FWI versus histology for specimen P1-S1.** Data points indicate mean values per grid box from Fig. 2, 3, and 4, panels B and C. Pearson correlation: two-sided, at 0.05 significance level; Magenta lines: linear fits.

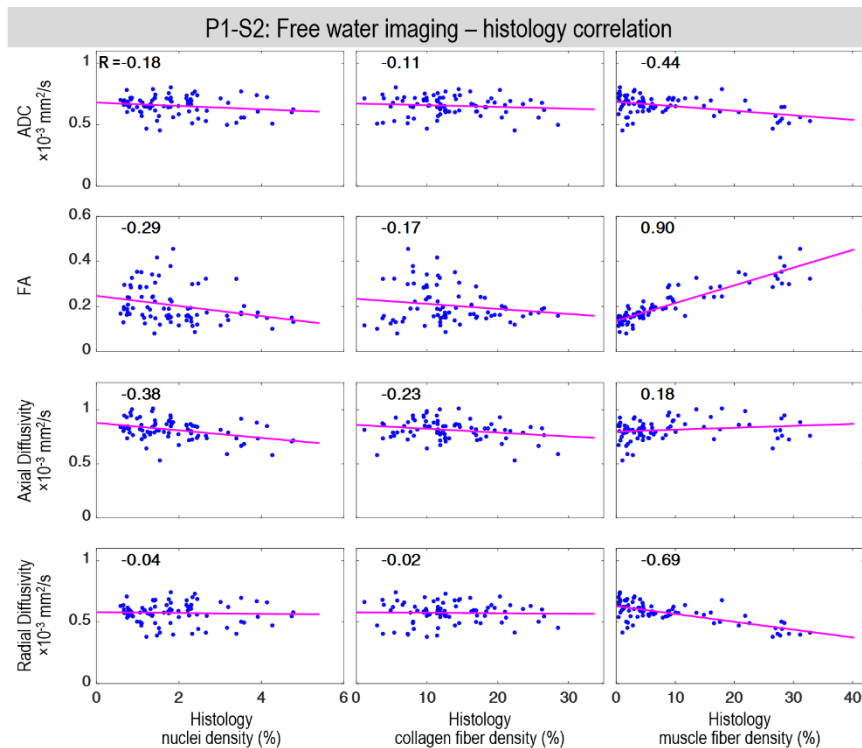

**Fig S. 10: Correlation analysis of FWI versus histology for specimen P1-S2.** Data points indicate mean values per grid box from Fig. 2, 3, and 4, panels B and C. Pearson correlation: two-sided, at 0.05 significance level; Magenta lines: linear fits.

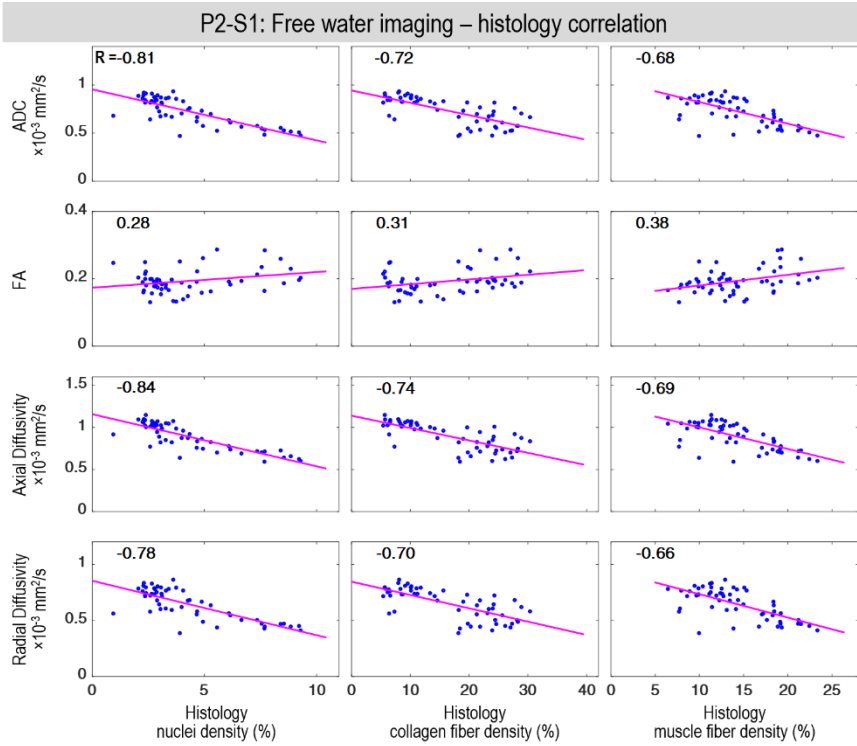

**Fig S. 11: Correlation analysis of FWI versus histology for specimen P2-S1.** Data points indicate mean values per grid box from Fig. 2, 3, and 4, panels B and C. Pearson correlation: two-sided, at 0.05 significance level; Magenta lines: linear fits.

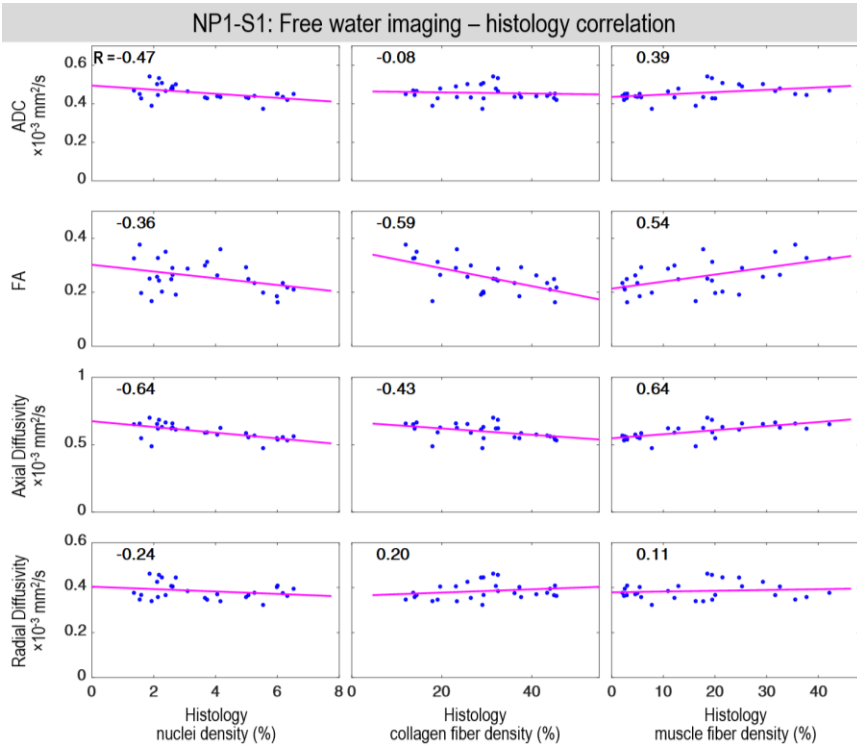

**Fig S. 12: Correlation analysis of FWI versus histology for specimen NP1-S1.** Data points indicate mean values per grid box from Fig. 2, 3, and 4, panels B and C. Pearson correlation: two-sided, at 0.05 significance level; Magenta lines: linear fits.



# Methods - Supplementary

## Whole cervix DBSI multi-tensor models

Table S. 1 Anisotropic tensor models for whole cervix DBSI

| Diffusivity $\times 10^{-3}$ mm <sup>2</sup> /s | Tensor 1 | Tensor 2 | Tensor 3 | Tensor 4 | Tensor 5 | Tensor 6 | Tensor 7 | Tensor 8 | Tensor 9 |
|-------------------------------------------------|----------|----------|----------|----------|----------|----------|----------|----------|----------|
| Radial Diffusivity (RD)                         | 0.2      | 0.3      | 0.4      | 0.4      | 0.5      | 0.6      | 0.7      | 0.9      | 1.2      |
| Axial Diffusivity (AD)                          | 1.2      | 1.8      | 2.0      | 1.6      | 1.6      | 1.8      | 2.1      | 2.7      | 3.6      |
| AD / RD                                         | 6        | 6        | 5        | 4        | 3.2      | 3.0      | 3.0      | 3.0      | 3.0      |

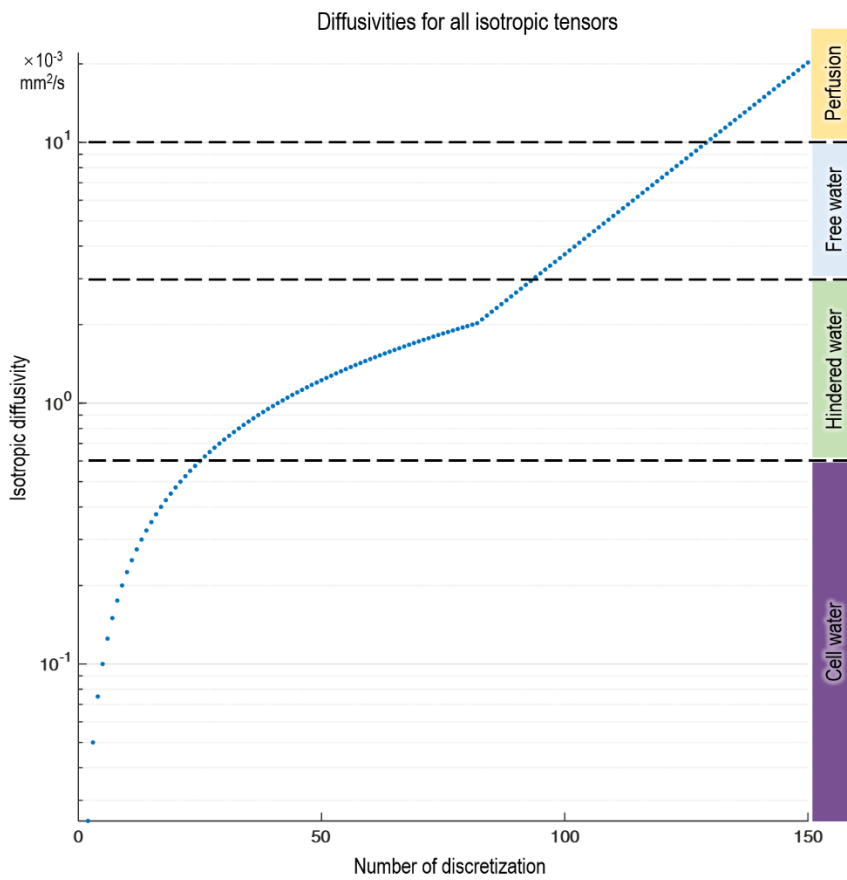

Fig S. 13: Isotropic tensor models for whole cervix DBSI

***b* table for both in vivo and ex vivo imaging**

**Table S. 2: *b* table for in vivo and ex vivo imaging**

| <i>b</i> value<br>in vivo | <i>b</i> value<br>ex vivo | <i>b</i> vector<br>x | <i>b</i> vector<br>y | <i>b</i> vector<br>z |
|---------------------------|---------------------------|----------------------|----------------------|----------------------|
| 0                         | 0                         | 0.000                | 0.000                | 0.000                |
| 10                        | 20                        | 0.685                | 0.430                | 0.589                |
| 50                        | 100                       | 0.000                | -1.000               | 0.000                |
| 110                       | 250                       | -0.046               | 0.895                | 0.443                |
| 200                       | 450                       | -0.306               | 0.572                | 0.761                |
| 310                       | 700                       | 0.577                | -0.577               | 0.577                |
| 540                       | 1210                      | 0.851                | -0.500               | 0.162                |
| 720                       | 1610                      | -0.526               | -0.809               | 0.262                |
| 900                       | 2020                      | 0.000                | 0.808                | -0.589               |
| 0                         | 0                         | 0.000                | 0.000                | 0.000                |
| 1120                      | 2520                      | 0.000                | 0.809                | 0.588                |
| 1260                      | 2830                      | 0.577                | 0.577                | -0.577               |
| 1390                      | 3130                      | -0.851               | 0.310                | -0.425               |
| 1520                      | 3410                      | -0.851               | 0.000                | 0.526                |
| 1640                      | 3700                      | 0.526                | -0.500               | -0.688               |
| 1770                      | 3980                      | 0.000                | 0.000                | 1.000                |
| 1900                      | 4280                      | 0.851                | 0.000                | 0.526                |
| 1900                      | 4280                      | 0.851                | 0.000                | 0.526                |
| 2000                      | 4500                      | 0.000                | -0.809               | -0.588               |
| 0                         | 0                         | 0.000                | 0.000                | 0.000                |
| 20                        | 40                        | 0.887                | 0.258                | 0.382                |
| 60                        | 140                       | 0.028                | -0.693               | -0.721               |
| 130                       | 300                       | -0.852               | -0.308               | 0.424                |
| 220                       | 500                       | 0.852                | 0.499                | 0.161                |
| 360                       | 810                       | 0.000                | -0.309               | -0.951               |
| 580                       | 1310                      | 0.000                | -0.310               | 0.951                |
| 760                       | 1710                      | -0.934               | -0.357               | 0.000                |
| 940                       | 2120                      | -0.577               | -0.577               | -0.577               |
| 0                         | 0                         | 0.000                | 0.000                | 0.000                |
| 1160                      | 2620                      | 0.000                | 0.934                | 0.356                |
| 1290                      | 2910                      | 0.851                | 0.500                | -0.163               |
| 1420                      | 3200                      | 0.000                | 0.308                | 0.951                |
| 1550                      | 3480                      | 0.357                | 0.000                | 0.934                |
| 1680                      | 3770                      | 0.851                | -0.500               | -0.163               |
| 1800                      | 4060                      | 0.934                | -0.357               | 0.000                |
| 1930                      | 4350                      | 0.851                | 0.000                | -0.526               |
| 1800                      | 4060                      | 0.934                | -0.357               | 0.000                |
| 1930                      | 4350                      | 0.851                | 0.000                | -0.526               |
| 2000                      | 4500                      | 0.000                | -0.809               | -0.588               |
| 0                         | 0                         | 0.000                | 0.000                | 0.000                |
| 20                        | 50                        | 0.129                | 0.799                | -0.588               |

|      |      |        |        |        |
|------|------|--------|--------|--------|
| 80   | 180  | -0.526 | -0.236 | -0.817 |
| 160  | 360  | -0.272 | -0.962 | -0.039 |
| 270  | 600  | 0.000  | -0.934 | -0.358 |
| 400  | 910  | 0.357  | 0.000  | -0.934 |
| 630  | 1410 | -0.851 | 0.309  | 0.425  |
| 810  | 1810 | -0.526 | 0.000  | 0.851  |
| 1030 | 2320 | -0.850 | 0.000  | -0.526 |
| 0    | 0    | 0.000  | 0.000  | 0.000  |
| 1200 | 2700 | 0.000  | 0.934  | -0.357 |
| 1320 | 2980 | -0.934 | 0.357  | 0.000  |
| 1450 | 3270 | 0.000  | 0.310  | -0.951 |
| 1580 | 3560 | -0.851 | -0.309 | -0.425 |
| 1710 | 3850 | -0.526 | -0.809 | -0.263 |
| 1840 | 4140 | 0.526  | 0.000  | -0.851 |
| 1970 | 4420 | -0.357 | 0.000  | 0.934  |
| 1710 | 3850 | -0.526 | -0.809 | -0.263 |
| 1840 | 4140 | 0.526  | 0.000  | -0.851 |
| 1970 | 4420 | -0.357 | 0.000  | 0.934  |
| 2000 | 4500 | 0.000  | -0.809 | -0.588 |
| 0    | 0    | 0.000  | 0.000  | 0.000  |
| 30   | 70   | 0.887  | 0.261  | 0.380  |
| 90   | 200  | 0.577  | -0.577 | -0.577 |
| 180  | 400  | -0.357 | 0.000  | -0.934 |
| 290  | 660  | 0.147  | -0.280 | 0.949  |
| 490  | 1110 | 0.000  | -0.934 | 0.356  |
| 670  | 1510 | -0.526 | 0.809  | 0.262  |
| 850  | 1910 | -0.526 | 0.500  | -0.688 |
| 1080 | 2420 | 0.526  | 0.501  | 0.687  |
| 0    | 0    | 0.000  | 0.000  | 0.000  |
| 1230 | 2760 | -0.526 | 0.809  | -0.263 |
| 1360 | 3050 | 0.934  | 0.357  | 0.000  |
| 1480 | 3340 | -0.526 | 0.000  | -0.851 |
| 1610 | 3630 | -0.526 | -0.500 | 0.688  |
| 1740 | 3920 | 1.000  | 0.000  | 0.000  |
| 1870 | 4200 | 0.526  | 0.000  | 0.851  |
| 2000 | 4490 | 0.000  | -0.809 | 0.588  |
| 1610 | 3630 | -0.526 | -0.500 | 0.688  |
| 1740 | 3920 | 1.000  | 0.000  | 0.000  |
| 1870 | 4200 | 0.526  | 0.000  | 0.851  |
| 2000 | 4490 | 0.000  | -0.809 | 0.588  |
| 2000 | 4500 | 0.000  | -0.809 | -0.588 |

## Ex vivo imaging of cervical tissue blocks

The tissue block was embedded in 2% agar gel in the custom specimen holder and then loaded into the custom-made Helmholtz pair coil.

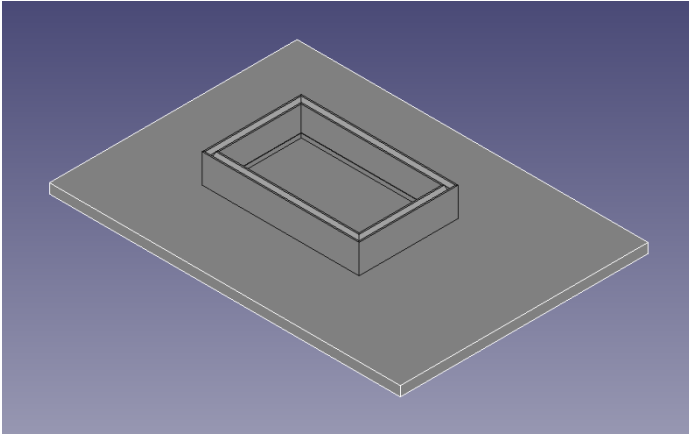

Fig S. 14 Custom cervix specimen holder

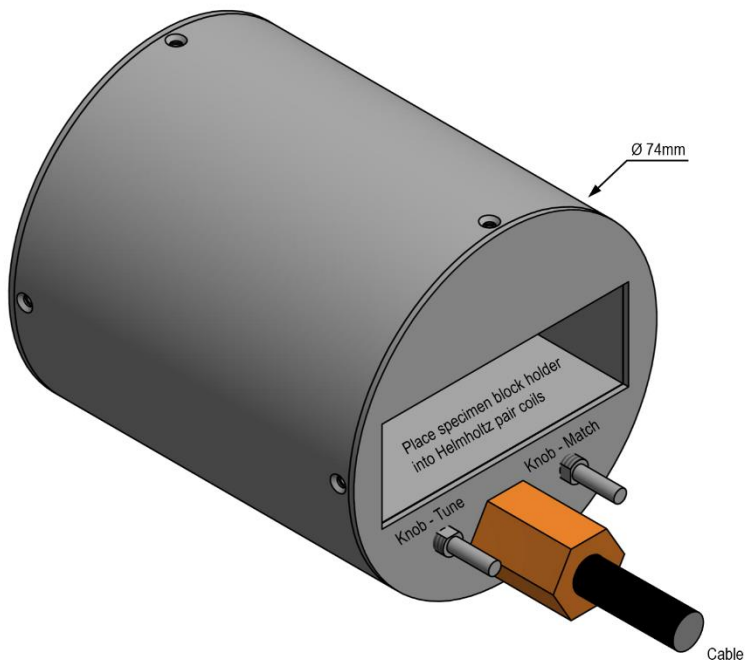

Fig S. 15 Custom Helmholtz pair coil

## Human in vivo MR imaging sequences

- 1) localizer
- 2) T1-weighted volume-interpolated breathhold examination (VIBE) sequence in the sagittal plane, with the following parameters: repetition time (TR) = 4.07 ms; echo time (TE) = 1.87 ms; field of view (FOV) =  $400 \times 400$  mm; data matrix,  $320 \times 320$ ; layer thickness, 4.0mm; slice spacing, 0.8 mm; number of layers, 80; flip angle,  $10^\circ$ .
- 3) T2-weighted turbo spin echo high-resolution images in sagittal plane, with the following parameters: TR = 4660 ms; TE = 96 ms; FOV,  $350 \times 350$  mm; data matrix,  $320 \times 650$ ; layer thickness, 4.0 mm; slice spacing, 0.8 mm; number of layers, 34; flip angle,  $155^\circ$ .
- 4) T2-weighted turbo spin echo high-resolution images in oblique planes perpendicular to cervical canal, with the following parameters: TR = 4110 ms; TE = 96 ms; FOV,  $400 \times 400$  mm; matrix,  $320 \times 650$ ; layer thickness, 4.0 mm; slice spacing, 0.8 mm; number of layers, 30; flip angle,  $155^\circ$ .
- 5) Two dimensional single-shot echo planar imaging diffusion-weighted sequence, with the following parameters: TR = 6300 ms; TE = 63 ms; FOV =  $350 \times 350$  mm; data matrix,  $128 \times 128$ ; slice thickness, 3.0 mm, no slice spacing. The diffusion gradients were applied in up to 74 directions (same as ex vivo, Table S.2) with B values ranging from 0 - 2000  $\text{s/mm}^2$ .
